# Supplementary material
Source: PubMed Central journal article supplement (PMC6445755)

**Supplemental figure 1. Flow cytometry gating strategy**

Supplemental Figure 1

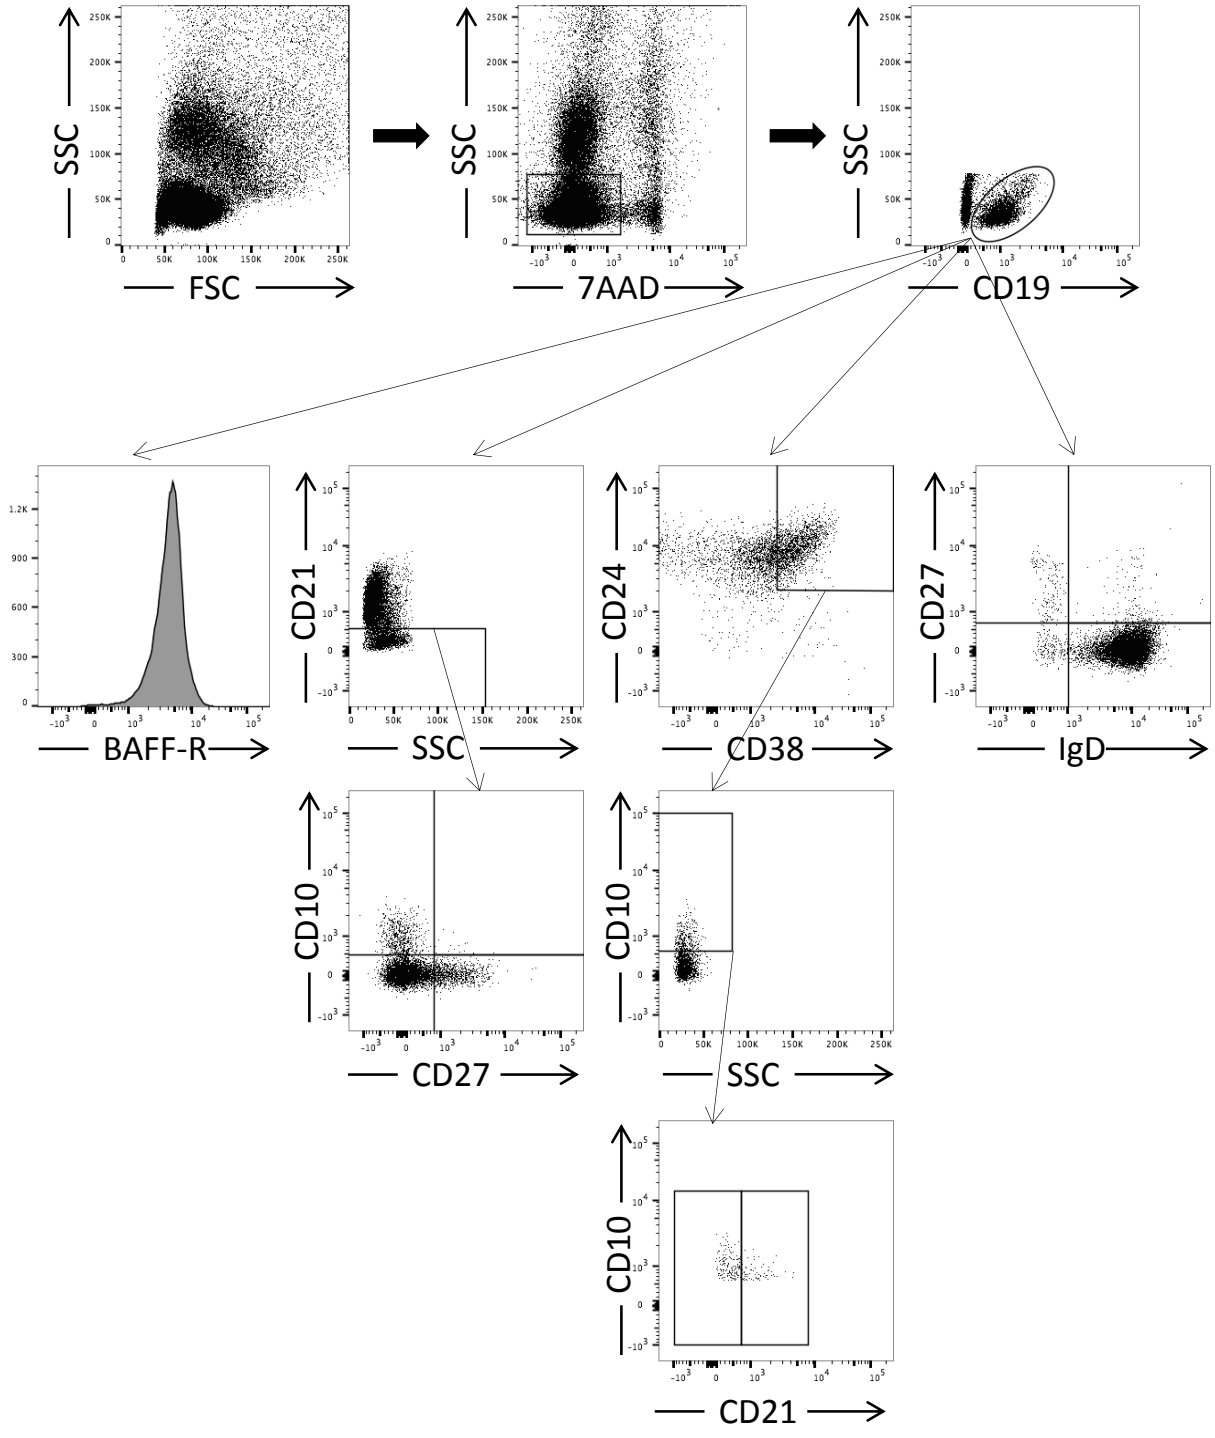

Supplement: NIHMS1517650-supplement-1.pdf [file NIHMS1517650-supplement-1.pdf]
